# Supplementary material
Source: publisher figshare collection journal article supplement (https://asha.figshare.com/articles/dataset/_/24422635)
Supplement: Supplementary file 1 [file 1]

**Supplemental Material S4.** Pairwise comparisons of the effect of input information order on each age group's changes of information order.

| Effect                      | Contrast                     | $\beta$      | $SE(\beta)$ | $z$          | $p$              |
|-----------------------------|------------------------------|--------------|-------------|--------------|------------------|
| Information order_GIVEN-NEW | <b>3yr - 5yr</b>             | <b>1.39</b>  | <b>0.33</b> | <b>4.21</b>  | <b>&lt; .001</b> |
|                             | <b>3yr - Adult</b>           | <b>3.64</b>  | <b>0.44</b> | <b>8.30</b>  | <b>&lt; .001</b> |
|                             | <b>5yr - Adult</b>           | <b>2.25</b>  | <b>0.44</b> | <b>5.14</b>  | <b>&lt; .001</b> |
| Information order_NEW-GIVEN | 3yr - 5yr                    | 0.25         | 0.33        | 0.76         | 1.000            |
|                             | <b>3yr - Adult</b>           | <b>0.95</b>  | <b>0.33</b> | <b>0.87</b>  | <b>.012</b>      |
|                             | 5yr - Adult                  | 0.70         | 0.33        | 2.15         | .095             |
| <b>Age group_3yr</b>        | <b>GIVEN-NEW - NEW-GIVEN</b> | <b>0.64</b>  | <b>0.27</b> | <b>2.41</b>  | <b>.016</b>      |
| Age group_5yr               | GIVEN-NEW - NEW-GIVEN        | -0.50        | 0.27        | -1.87        | .062             |
| <b>Age group_Adult</b>      | <b>GIVEN-NEW - NEW-GIVEN</b> | <b>-2.05</b> | <b>0.40</b> | <b>-5.18</b> | <b>&lt; .001</b> |

Note. Significant effects are highlighted in bold.
