# Supplementary material
Source: publisher figshare collection journal article supplement (https://asha.figshare.com/articles/dataset/_/24422635)
Supplement: Supplementary file 2 [file 1]

**Supplemental Material S5.** Pairwise comparisons of the effects of input clause length and input information order on each age group's changes of clause length (in words).

| Effect                                                  | Contrast           | $\beta$      | $SE(\beta)$ | $t$          | $p$              |
|---------------------------------------------------------|--------------------|--------------|-------------|--------------|------------------|
| Clause length_SHORT-LONG<br>Information order_GIVEN-NEW | 3yr - 5yr          | 0.01         | 0.29        | 0.05         | 1.000            |
|                                                         | 3yr - Adult        | 0.50         | 0.29        | 1.75         | .245             |
|                                                         | 5yr - Adult        | 0.49         | 0.29        | 1.71         | .265             |
| Clause length_SHORT-LONG<br>Information order_NEW-GIVEN | 3yr - 5yr          | -0.40        | 0.30        | -1.36        | .524             |
|                                                         | 3yr - Adult        | -0.45        | 0.29        | -1.53        | .381             |
|                                                         | 5yr - Adult        | -0.05        | 0.29        | -0.16        | 1.000            |
| Clause length_LONG-SHORT<br>Information order_GIVEN-NEW | <b>3yr - 5yr</b>   | <b>-1.03</b> | <b>0.29</b> | <b>-3.50</b> | <b>.002</b>      |
|                                                         | <b>3yr - Adult</b> | <b>-2.21</b> | <b>0.29</b> | <b>-7.61</b> | <b>&lt; .001</b> |
|                                                         | <b>5yr - Adult</b> | <b>-1.18</b> | <b>0.29</b> | <b>-4.12</b> | <b>&lt; .001</b> |
| Clause length_LONG-SHORT<br>Information order_NEW-GIVEN | <b>3yr - 5yr</b>   | <b>-0.91</b> | <b>0.30</b> | <b>-3.06</b> | <b>.008</b>      |
|                                                         | <b>3yr - Adult</b> | <b>-1.23</b> | <b>0.29</b> | <b>-4.18</b> | <b>&lt; .001</b> |
|                                                         | 5yr - Adult        | -0.31        | 0.29        | -1.10        | .824             |

*Note.* Significant effects are highlighted in bold.
