# Supplementary material
Source: publisher figshare collection journal article supplement (https://asha.figshare.com/articles/dataset/_/24422635)
Supplement: Supplementary file 3 [file 1]

**Supplemental Material S3.** Pairwise comparisons of the effect of input clause order on each age group's changes of clause order.

| Effect                 | Contrast                     | $\beta$      | $SE(\beta)$ | $z$          | $p$              |
|------------------------|------------------------------|--------------|-------------|--------------|------------------|
| Clause order_MAIN-WHEN | 3yr - 5yr                    | -0.12        | 0.53        | -0.22        | 1.000            |
|                        | 3yr - Adult                  | -0.26        | 0.52        | -0.50        | 1.000            |
|                        | 5yr - Adult                  | -0.14        | 0.33        | -0.43        | 1.000            |
| Clause order_WHEN-MAIN | <b>3yr - 5yr</b>             | <b>1.19</b>  | <b>0.51</b> | <b>2.35</b>  | <b>.057</b>      |
|                        | <b>3yr - Adult</b>           | <b>2.39</b>  | <b>0.51</b> | <b>4.67</b>  | <b>&lt; .001</b> |
|                        | <b>5yr - Adult</b>           | <b>1.20</b>  | <b>0.35</b> | <b>3.40</b>  | <b>.002</b>      |
| <b>Age group_3yr</b>   | <b>MAIN-WHEN - WHEN-MAIN</b> | <b>-1.61</b> | <b>0.54</b> | <b>-3.00</b> | <b>.003</b>      |
| Age group_5yr          | MAIN-WHEN - WHEN-MAIN        | -0.29        | 0.28        | -1.06        | .288             |
| <b>Age group_Adult</b> | <b>MAIN-WHEN - WHEN-MAIN</b> | <b>1.04</b>  | <b>0.26</b> | <b>4.02</b>  | <b>&lt; .001</b> |

*Note.* Significant effects are highlighted in bold.
