# Supplementary material
Source: publisher figshare collection journal article supplement (https://asha.figshare.com/articles/dataset/_/24422635)
Supplement: Supplementary file 4 [file 1]

**Supplemental Material S2.** Significant effects and interactions in the final model of the factors influencing participants' changes of clause length (in syllables). See Data Analysis section for approach to model building.

| Variable                                                                      | $\beta$      | $SE(\beta)$ | $t$           | $p$              |
|-------------------------------------------------------------------------------|--------------|-------------|---------------|------------------|
| (Intercept)                                                                   | -1.06        | 0.38        | -2.74         | .007             |
| <b>Age group_5yr</b>                                                          | <b>2.01</b>  | <b>0.52</b> | <b>3.90</b>   | <b>&lt; .001</b> |
| <b>Age group_Adult</b>                                                        | <b>4.56</b>  | <b>0.51</b> | <b>8.94</b>   | <b>&lt; .001</b> |
| Clause length_SHORT-LONG                                                      | 0.08         | 0.49        | 0.17          | .869             |
| Information order_NEW-GIVEN                                                   | 0.45         | 0.51        | 0.88          | .379             |
| <b>Age group_5yr: Clause length_SHORT-LONG</b>                                | <b>-2.75</b> | <b>0.66</b> | <b>-4.18</b>  | <b>&lt; .001</b> |
| <b>Age group_Adult: Clause length_SHORT-LONG</b>                              | <b>-7.50</b> | <b>0.65</b> | <b>-11.51</b> | <b>&lt; .001</b> |
| Age group_5yr: Information order_NEW-GIVEN                                    | -0.63        | 0.67        | -0.94         | .350             |
| <b>Age group_Adult: Information order_NEW-GIVEN</b>                           | <b>-2.45</b> | <b>0.66</b> | <b>-3.72</b>  | <b>&lt; .001</b> |
| Clause length_SHORT-LONG: Information order_NEW-GIVEN                         | -0.49        | 0.71        | -0.69         | .489             |
| Age group_5yr: Clause length_SHORT-LONG: Information order_NEW-GIVEN          | 1.64         | 0.94        | 1.74          | .081             |
| <b>Age group_Adult: Clause length_SHORT-LONG: Information order_NEW-GIVEN</b> | <b>4.95</b>  | <b>0.93</b> | <b>5.32</b>   | <b>&lt; .001</b> |

*Note.* Age group = Adult vs. 5yr vs. 3yr (reference level); Clause length = SHORT-LONG vs. LONG-SHORT (reference level); Information order = NEW-GIVEN vs. GIVEN-NEW (reference level). Number of observations = 1,125. Significant effects are highlighted in bold.
