# Supplementary material
Source: publisher figshare collection journal article supplement (https://asha.figshare.com/articles/dataset/_/24422635)
Supplement: Supplementary file 5 [file 1]

**Supplemental Material S1.** Test sentences for the sentence repetition task.

| Condition | Sentences No. | Sentences                                                           |
|-----------|---------------|---------------------------------------------------------------------|
| A         | Introductory  | Pig is swimming. Oh, he's swimming.                                 |
|           | 1             | When Pig is swimming, Little Panda is drinking very fast.           |
|           | 2             | When Pig is swimming, Tiny Froggy is jumping really high.           |
|           | 3             | When Pig is swimming, Mister Elephant is sitting so still.          |
| B         | Introductory  | Mister Zebra is pushing really hard. Oh, he's pushing really hard.  |
|           | 1             | When Sheep is drawing, Mister Zebra is pushing really hard.         |
|           | 2             | When Cat is singing, Mister Zebra is pushing really hard.           |
|           | 3             | When Seal is falling, Mister Zebra is pushing really hard.          |
| C         | Introductory  | Crocodile is crying so badly. Oh, he's crying so badly.             |
|           | 1             | When Crocodile is crying so badly, Brown Bear is sleeping.          |
|           | 2             | When Crocodile is crying so badly, White Swan is eating.            |
|           | 3             | When Crocodile is crying so badly, Big Fox is sweeping.             |
| D         | Introductory  | Brown Horse is running. Oh, he's running.                           |
|           | 1             | When Donkey is talking very loudly, Brown Horse is running.         |
|           | 2             | When Spider is climbing really slowly, Brown Horse is running.      |
|           | 3             | When Kangaroo is hiding so quietly, Brown Horse is running.         |
| E         | Introductory  | Miss Duck is paddling. Oh, she's paddling.                          |
|           | 1             | Miss Duck is paddling, when Bunny is hopping very slowly.           |
|           | 2             | Miss Duck is paddling, when Dinosaur is swinging really high.       |
|           | 3             | Miss Duck is paddling, when Rhinoceros is spinning so fast.         |
| F         | Introductory  | Mister Fish is knocking very loudly. Oh, he's knocking very loudly. |
|           | 1             | Mister Fish is knocking very loudly, when Snake is crawling.        |
|           | 2             | Mister Fish is knocking very loudly, when Dog is digging.           |
|           | 3             | Mister Fish is knocking very loudly, when Wolf is walking.          |
| G         | Introductory  | Hamster is sneezing really badly. Oh, he's sneezing really badly.   |
|           | 1             | Bird is flying high, when Hamster is sneezing really badly.         |
|           | 2             | Mouse is walking fast, when Hamster is sneezing really badly.       |
|           | 3             | Shark is moving fast, when Hamster is sneezing really badly.        |
| H         | Introductory  | Cow is sliding. Oh, she's sliding.                                  |
|           | 1             | Blue Parrot is laughing very loudly, when Cow is sliding.           |
|           | 2             | Tall Giraffe is turning really quickly, when Cow is sliding.        |
|           | 3             | Little Koala is dancing so fast, when Cow is sliding.               |
